# Supplementary material for: Temporal evolution of programmed death-ligand 1 expression in patients with non-small cell lung cancer
Source: PubMed Central journal article supplement — Korean J Intern Med. 2021 Apr 6;36(4):975–84. doi: 10.3904/kjim.2020.178 (PMC8273838; doi:10.3904/kjim.2020.178), 2021-04-06
Supplement: kjim-2020-178-suppl1.pdf [file kjim-2020-178-suppl1.pdf]

**Supplementary Table 1. The usage of various kinds of IHC assays for the assessment of PD-L1 expression**

|       | Archival sample | Recent sample | Total      |
|-------|-----------------|---------------|------------|
| SP263 | 65 (59.6)       | 88 (80.7)     | 153 (70.2) |
| 22C3  | -               | 6 (5.5)       | 6 (2.8)    |
| E1L3N | 44 (40.4)       | 14 (12.8)     | 58 (26.6)  |
| SP142 | -               | 1 (0.9)       | 1 (0.5)    |

Values are presented as number (%).

IHC, immunohistochemistry; PD-L1, programmed death-ligand 1.
