# Supplementary material for: Temporal evolution of programmed death-ligand 1 expression in patients with non-small cell lung cancer
Source: PubMed Central journal article supplement — Korean J Intern Med. 2021 Apr 6;36(4):975–84. doi: 10.3904/kjim.2020.178 (PMC8273838; doi:10.3904/kjim.2020.178), 2021-04-06
Supplement: kjim-2020-178-suppl2.pdf [file kjim-2020-178-suppl2.pdf]

**Supplementary Table 2. Major clinicopathologic characteristics of patients in the PD-L1 (-/+ ) group**

| Sex/Age, yr     | Pathology      | EGFR   | ALK      | Archival tissue              | Recent tissue                | Interval periods, mo | Treatment during interval                                                                                                     |
|-----------------|----------------|--------|----------|------------------------------|------------------------------|----------------------|-------------------------------------------------------------------------------------------------------------------------------|
| Female, male/74 | Squamous       | NA     | NA       | Lung                         | Skin (anterior neck)         | 3-37                 | Gemcitabine plus carboplatin                                                                                                  |
| Male/71         | Adenocarcinoma | L858R  | Negative | Lung                         | Lung                         | 3-93                 | Gefitinib                                                                                                                     |
| Male/80         | Squamous       | NA     | NA       | Lung                         | Lymph node (cervical)        | 6-33                 | Gemcitabine plus carboplatin                                                                                                  |
| Male/67         | Adenocarcinoma | L858R  | Negative | Lung                         | Lymph node (supraclavicular) | 7-43                 | Clinical trial (olmutinib)                                                                                                    |
| Male/70         | Adenocarcinoma | WT     | Negative | Lung                         | Lymph node (supraclavicular) | 10-63                | CCRT (paclitaxel plus carboplatin)                                                                                            |
| Female/53       | Adenocarcinoma | L858R  | Negative | Lung                         | Lymph node (mediastinal)     | 10-93                | Gefitinib                                                                                                                     |
| Male/67         | Adenocarcinoma | WT     | Negative | Pleura                       | Lymph node (supraclavicular) | 11-03                | Pemetrexed plus cisplatin                                                                                                     |
| Female/62       | Adenocarcinoma | E19del | Negative | Lung                         | Lung                         | 16-57                | Gefitinib, pemetrexed                                                                                                         |
| Male/63         | Squamous       | NA     | NA       | Lung                         | Lymph node (mediastinal)     | 17-07                | CCRT (paclitaxel plus carboplatin)                                                                                            |
| Male/58         | Squamous       | NA     | NA       | Lung                         | Lymph node (supraclavicular) | 18-03                | Surgical resection, vinorelbine plus cisplatin                                                                                |
| Male/75         | Squamous       | NA     | NA       | Lung                         | Liver                        | 20-20                | CCRT (paclitaxel plus carboplatin), gemcitabine plus carboplatin, radiotherapy                                                |
| Male/66         | Adenocarcinoma | L858R  | Negative | Lung                         | Lung                         | 26-40                | Gemcitabine plus carboplatin, paclitaxel, radiotherapy, clinical trial (ATR inhibitor)                                        |
| Female/58       | Adenocarcinoma | L858R  | Negative | Kidney                       | Lymph node (supraclavicular) | 27-37                | Surgical resection, gemcitabine plus carboplatin                                                                              |
| Male/76         | Mixed          | WT     | Negative | Lung                         | Lung                         | 31-53                | Bronchoscopic tumor removal                                                                                                   |
| Female/71       | Adenocarcinoma | E19del | Negative | Lung                         | Lymph node (axillary)        | 32-03                | Gefitinib, pemetrexed                                                                                                         |
| Male/69         | Adenocarcinoma | WT     | Positive | Lymph node (supraclavicular) | Liver                        | 37-10                | CCRT (paclitaxel plus carboplatin), crizotinib, alectinib, pemetrexed                                                         |
| Male/67         | Adenocarcinoma | WT     | Negative | Lung                         | Lymph node (supraclavicular) | 38-00                | Surgical resection                                                                                                            |
| Male/73         | Squamous       | NA     | NA       | Lung                         | Lung                         | 44-67                | Surgical resection, paclitaxel plus carboplatin<br>CCRT (paclitaxel plus carboplatin) gemcitabine plus carboplatin, docetaxel |
| Male/78         | Adenocarcinoma | WT     | Negative | Lung                         | Bone, T1-3                   | 46-67                | Surgical resection, CCRT (paclitaxel plus carboplatin)                                                                        |

PD-L1, programmed death-ligand 1; EGFR, epidermal growth factor receptor; ALK, anaplastic lymphoma kinase; NA, not applicable; WT, wild type; CCRT, concurrent chemoradiotherapy; ATR, ataxia telangiectasia and Rad3 related.
