# Supplementary material for: Temporal evolution of programmed death-ligand 1 expression in patients with non-small cell lung cancer
Source: PubMed Central journal article supplement — Korean J Intern Med. 2021 Apr 6;36(4):975–84. doi: 10.3904/kjim.2020.178 (PMC8273838; doi:10.3904/kjim.2020.178), 2021-04-06
Supplement: kjim-2020-178-suppl4.pdf [file kjim-2020-178-suppl4.pdf]

**Supplementary Table 4. Multivariate analysis of overall survival after the administration of immune checkpoint inhibitor considering four different PD-L1 status**

| Parameter                                               | Univariate analysis |           |                    | Multivariate analysis |           |                    |
|---------------------------------------------------------|---------------------|-----------|--------------------|-----------------------|-----------|--------------------|
|                                                         | HR                  | CI        | p value            | HR                    | CI        | p value            |
| Age                                                     | 0.99                | 0.96–1.03 | 0.681              | 1.04                  | 0.99–1.10 | 0.117              |
| Sex (female as reference)                               | 0.40                | 0.19–0.82 | 0.013 <sup>a</sup> | 4.22                  | 0.37–47.6 | 0.244              |
| Smoking status (never smoker as reference)              |                     |           |                    |                       |           |                    |
| Current/former smokers                                  | 0.40                | 0.19–0.83 | 0.014 <sup>a</sup> | 0.07                  | 0.01–0.79 | 0.032 <sup>a</sup> |
| Histologic subtype (adenocarcinoma as reference)        |                     |           | 0.163              |                       |           | 0.092              |
| Squamous                                                | 0.76                | 0.34–1.66 | 0.484              | 1.73                  | 0.54–5.50 | 0.356              |
| Others                                                  | 0.31                | 0.09–1.06 | 0.061              | 0.30                  | 0.08–1.11 | 0.070              |
| EGFR mutation (absent as reference)                     | 2.24                | 1.05–4.79 | 0.038 <sup>a</sup> | 2.42                  | 0.78–7.47 | 0.125              |
| No. of prior chemotherapy regimen (1 or 2 as reference) |                     |           |                    |                       |           |                    |
| 3 or more                                               | 2.22                | 1.09–4.53 | 0.029 <sup>a</sup> | 1.38                  | 0.47–4.01 | 0.555              |
| ECOG (0 or 1 as reference)                              |                     |           |                    |                       |           |                    |
| ECOG 2 or more                                          | 2.72                | 1.36–5.53 | 0.006 <sup>a</sup> | 2.42                  | 0.94–6.27 | 0.068              |
| PD-L1 classification (PD-L1 (-/-) as reference)         |                     |           | 0.160              |                       |           | 0.179              |
| PD-L1 (-/+)                                             | 0.51                | 0.19–1.38 | 0.185              | 0.30                  | 0.09–1.04 | 0.057              |
| PD-L1 (+/-)                                             | 0.28                | 0.08–1.02 | 0.054              | 0.20                  | 0.03–1.21 | 0.080              |
| PD-L1 (+/+)                                             | 0.45                | 0.19–1.07 | 0.071              | 0.33                  | 0.10–1.09 | 0.069              |

PD-L1, programmed death-ligand 1; HR, hazard ratio; CI, confidence interval; EGFR, epidermal growth factor receptor; ECOG, Eastern Cooperative Oncology Group.

<sup>a</sup>p < 0.05.
