# Supplementary material for: Temporal evolution of programmed death-ligand 1 expression in patients with non-small cell lung cancer
Source: PubMed Central journal article supplement — Korean J Intern Med. 2021 Apr 6;36(4):975–84. doi: 10.3904/kjim.2020.178 (PMC8273838; doi:10.3904/kjim.2020.178), 2021-04-06
Supplement: kjim-2020-178-suppl5.pdf [file kjim-2020-178-suppl5.pdf]

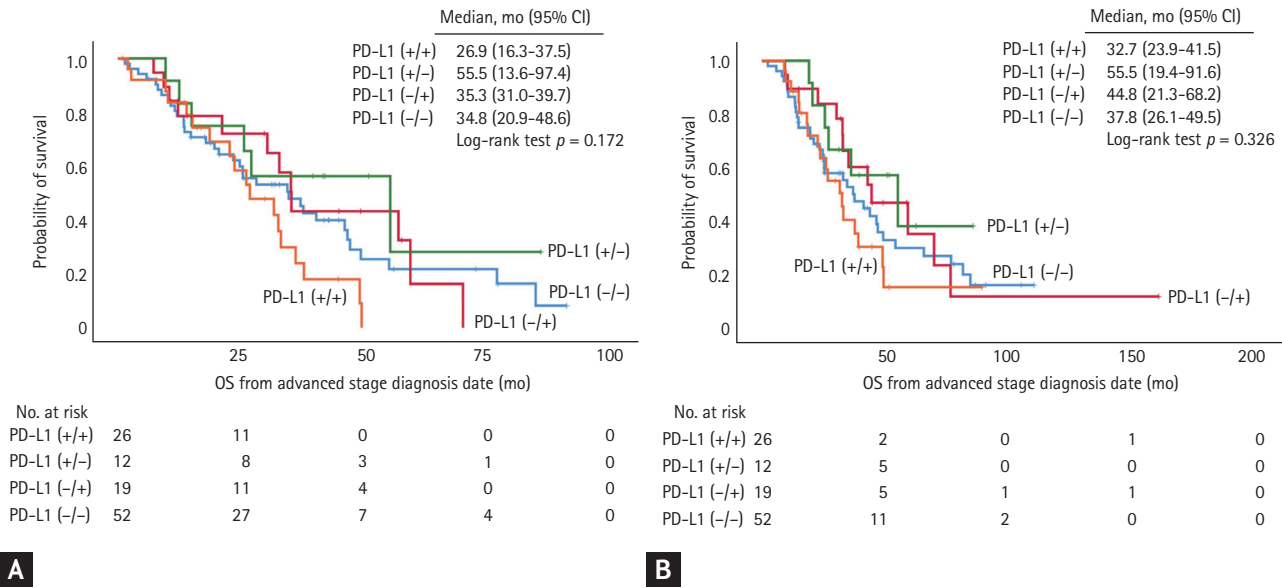

**Supplementary Figure 1.** Overall survival (OS) of patients in four groups categorized according to changes in programmed death-ligand 1 (PD-L1) expression. (A) There was no significant difference in the OS, calculated from the date of advanced diagnosis, among patients in the four groups ( $p = 0.172$ ). (B) There was no significant difference in the OS, calculated from the date of initial diagnosis, among patients in the four groups ( $p = 0.326$ ). CI, confidence interval.
