# Supplementary material for: Temporal evolution of programmed death-ligand 1 expression in patients with non-small cell lung cancer
Source: PubMed Central journal article supplement — Korean J Intern Med. 2021 Apr 6;36(4):975–84. doi: 10.3904/kjim.2020.178 (PMC8273838; doi:10.3904/kjim.2020.178), 2021-04-06
Supplement: kjim-2020-178-suppl7.pdf [file kjim-2020-178-suppl7.pdf]

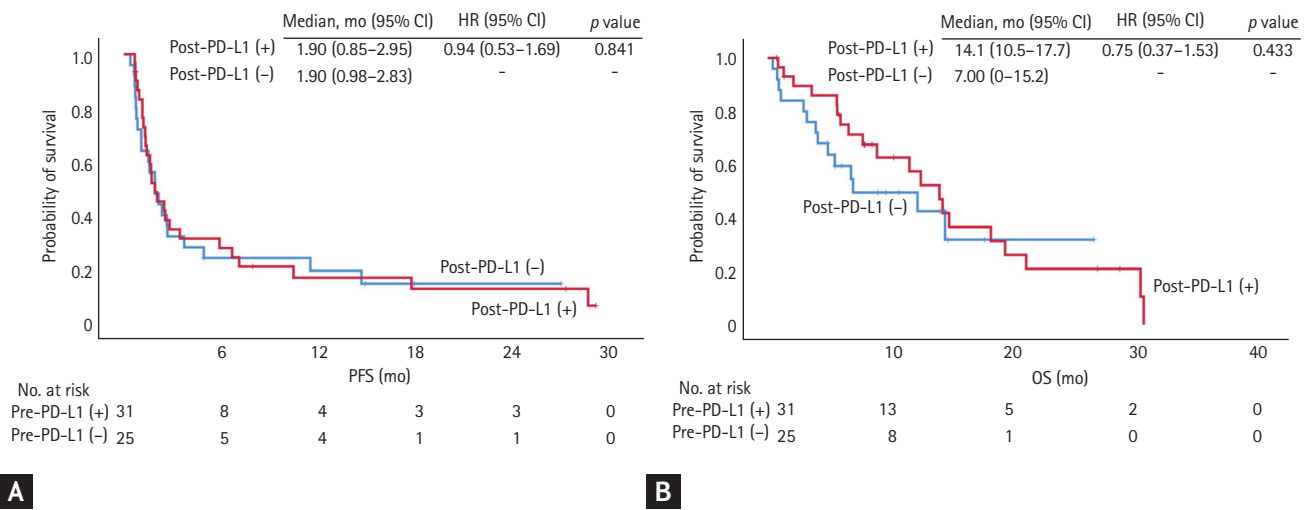

**Supplementary Figure 3.** Comparison of responses to immune checkpoint inhibitors between patients with programmed death-ligand 1 (PD-L1) positivity in recent samples (post-PD-L1 [+]) and those with PD-L1 negativity in recent samples (post-PD-L1 [-]). There were no significant differences in (A) progression-free survival (PFS) and (B) overall survival (OS) between the two groups. HR, hazard ratio; CI, confidence interval.
